1 **Reproductive phenology of the eastern oyster, *Crassostrea virginica* (Gmelin, 1791), along a**  
2 **temperate estuarine salinity gradient**

3

4 Kaili M. Gregory <sup>1,2</sup>

5 Dr. Katherine McFarland<sup>1,3</sup>

6 Dr. Matthew P. Hare<sup>1</sup>

7

8 <sup>1</sup>*Department of Natural Resources and the Environment, Cornell University, Ithaca, NY;*

9 <sup>2</sup>*Department of Wildlife Ecology and Conservation, University of Florida, Gainesville, FL;*

10 <sup>3</sup>*NOAA Fisheries NEFSC, Milford Laboratory, Milford, CT*

11

12 **ABSTRACT**

13           Low salinity can negatively affect reproduction in estuarine bivalves. The spatial and  
14 temporal extent of these effects are important to inform models of population dynamics,  
15 environmental risk assessments, restoration efforts, and predictions of climate change effects.  
16 We hypothesized that oysters at low salinity sites would have delayed gametogenesis compared  
17 to their higher salinity counterparts in downstream experimental cages. The timing of  
18 gametogenesis and spawning was observed June – August for 2-year-old oysters from three  
19 distinct ancestries (Native, Hatchery, Aquaculture), outplanted at age 1 month along the salinity  
20 gradient (3–30 psu) of a temperate estuary. A second season of data was collected from 3-year-  
21 old Aquaculture oysters (comparable to year 1 data) and Native adult oysters transplanted one  
22 year prior. Dermo was very low both years. A delay in gametogenesis and spawning was  
23 observed for all ancestries at low salinity relative to higher salinity sites during July and August  
24 of the first year but not the second year. In contrast, June showed the reverse pattern with  
25 northern low salinity sites having more advanced gonad index (2.65) than a high salinity site  
26 (1.46). This difference in average gonad index was 2.65 vs 1.46, respectively, for the Native line  
27 and 2.62 vs 2.08 for Aquaculture. Low salinity seemed to not only induce earlier gametogenesis  
28 in June, but also extended the reproductive season relative to higher salinity sites. Among oyster  
29 ancestries, the Aquaculture line stood out as having 30 – 48% lower gametogenic synchrony  
30 within sites, but only in 2018. Despite some dependence of reproductive phenology on salinity  
31 variation, the Native low salinity population demonstrates notable reproductive plasticity in the  
32 completion of a reproductive cycle across a wide range of salinities, an encouraging result for  
33 potential future restoration strategies.

34 Keywords: gametogenesis, salinity, ancestry, histology, reproduction, *Perkinsus marinus*

## 35 INTRODUCTION

36 Estuaries are ecologically vital ecotones characterized by a salinity gradient (Telesh and  
37 Khlebovich 2010). Average salinity levels fluctuate with tide, weather, river discharge, and  
38 season, with a general rise in salinity as proximity to the ocean increases (Warner et al. 2005).  
39 Many species are adapted to the variable salinity conditions of estuaries, whereas others are  
40 interlopers that take advantage of estuarine habitats during one or more life stages (Able 2005;  
41 Lellis-Dibble 2008). Among estuarine adapted species, physical niche is often described using a  
42 habitat suitability index constructed from viability or growth rate across different combinations  
43 of estuarine environments (Barnes et al. 2007; Swannack et al. 2014; Linhoss et al. 2016). These  
44 indices help guide habitat protection priorities and restoration planning by modelling how  
45 species would fare in specified areas. There are two aspects of population variation that are  
46 rarely accounted for with these indices: (1) phenotypic plasticity and (2) genetic differences  
47 among local or supplemented populations. Phenotypic plasticity can dramatically broaden the  
48 realized niche of a population, so experiments that inform performance indices should ideally  
49 include a full range of acclimation effects to accurately predict performance at the margin.  
50 Genetic differences among local populations, originating from within-generation selection rather  
51 than multigenerational adaptation (Marshall et al. 2010; Sanford and Kelly 2011), have potential  
52 to affect population resilience through variation in life history traits, including the degree of  
53 phenotypic plasticity (Eierman and Hare 2015).

54 With metapopulation structure as our within-estuary model, and given the added  
55 productivity and resilience expected from portfolio effects when component populations have  
56 somewhat independent life history or population dynamics (Lipcius et al. 2008; Schindler et al.  
57 2010), it is important to document performance variation among the diverse habitats within an

58 estuary. Here, we focus on a trait that is poorly known for many estuarine organisms -  
59 gametogenic and spawning phenology relative to the salinity gradient. Spawning phenology  
60 differences across an estuarine metapopulation could have a large impact on recruitment and  
61 population dynamics because the timing of larval production, relative to hydrodynamic,  
62 microalgal, and community ecology dynamics, can be expected to constrain or promote larval  
63 survivorship (Starr et al. 1990; Morgan 1995).

64 Our study organism is the eastern oyster (*Crassostrea virginica*, Gmelin, 1791) because  
65 of its keystone role, contributing valuable ecosystem services to estuarine communities such as  
66 water filtration, benthic pelagic coupling, and a structurally complex benthic reef habitat used by  
67 many commercial fish species (Coen et al. 2007; Beck et al. 2011; Bricker et al. 2020; Rose et al.  
68 2021). The synergistic mix of coastal degradation, overharvesting, disease, eutrophication, and  
69 climate change threaten to degrade oyster populations to functional extinction in some regions, if  
70 it has not done so already (Beck et al. 2011). While salinity is considered to be a weak or  
71 negligible environmental factor for triggering spawning in eastern oysters relative to temperature  
72 and chemical cues (Thompson et al. 1996), its effect on pre-spawning gametogenic development  
73 and overall reproductive timing is much less studied. More fully understanding the effect of  
74 salinity variation on reproductive phenology has the potential to inform eastern oyster population  
75 dynamic models, environmental risk assessments, restoration efforts, and improve predictions of  
76 the effects of climate change (Barnes et al. 2007; Marshall et al. 2010; Levinton et al. 2011). For  
77 these reasons, this study primarily examines the effect of natural estuarine salinity variation on  
78 the reproductive phenology of the eastern oyster.

79 Unfortunately, many estuaries no longer have extant populations of eastern oysters along  
80 the entire salinity gradient. In fact, the desire to restore full metapopulation structure within

81 estuaries provides an important motivation for understanding how salinity variation affects  
82 phenology. The effects of salinity variation on overall reproductive timing has received little  
83 attention outside of aquaculture settings. It is well-established that the timing of spawning for  
84 eastern oysters is closely correlated with rising temperatures, particularly in temperate estuaries  
85 where reproduction has a more pronounced seasonality (Loosanof and Davis 1952; Davis and  
86 Calabrese 1964; Bourlès et al. 2009). The interactive effects of salinity and temperature  
87 influence multiple aspects of oyster life history traits such as mortality, growth, and survival at  
88 all life stages (Davis and Calabrese 1964; Rybovich et al. 2016; McFarland et al. 2022). Multiple  
89 studies have shown that low salinity environments (< 6 psu) can inhibit or depress  
90 gametogenesis in oysters (Butler 1949; Loosanof 1953; Shafee and Daoudi 1991; Shumway  
91 1996; Honig et al. 2014; Volety et al. 2017), but the effect of salinity variation specifically on  
92 reproductive phenology has been much less studied. Butler (1949) addressed how natural salinity  
93 variation affects gametogenic progression using histology, yet that case involved unusually  
94 protracted and extreme low salinity conditions in the upper Chesapeake Bay rather than the  
95 average salinity gradient experienced by an estuarine oyster metapopulation. The strongest data  
96 relating salinity to reproductive phenology that we are aware of come from a 15-year time series  
97 of monthly oyster collections at five sites along the Caloosahatchee River Estuary, Florida,  
98 ranging from 12 to 28 average salinity in September (the annual salinity low point). Based on  
99 gonad index averages over 15 years for wet, moderate, and dry subsets, McFarland et al. (2022)  
100 found that the upper-most site had the earliest gametogenic development and the longest overall  
101 reproductive season. Dermo disease was negatively correlated with salinity and average gonad  
102 index, making it difficult to infer the separate phenology effects of these two factors (McFarland  
103 et al. 2022).

104 Dermo disease is caused by the pathogen *Perkinsus marinus*. Moderate to heavy infection  
105 reduces an oyster's investment in reproduction and shell growth, with the potential to cause  
106 mortality and devastate oyster populations (Chu and La Peyre 1993; Powell et al. 1996). This  
107 disease poses a pervasive risk to populations across the eastern seaboard and is thus of great  
108 concern to management and restoration planning (Andrews 1988; Dittman et al. 2001;  
109 Mackenzie 2007). Non-lethal infection intensities can have significant negative effects on gonad  
110 size and gametogenic development (Dittman et al. 2001). Dermo disease risk is largely limited to  
111 high and moderate salinity environments ( $\geq 12$  psu) because of the pathogen's environmental  
112 limitations (Powell et al. 1996; Levinton et al. 2011). Thus, while oyster gametogenesis is  
113 inhibited in extreme low salinity environments, such areas can also serve as a refuge from  
114 disease (La Peyre et al. 2003; La Peyre et al. 2016). Documenting Dermo prevalence can not  
115 only help to interpret potential mechanisms limiting gametogenesis between high and low  
116 salinity sites, but it also provides a critical baseline metric to inform restoration planning and  
117 monitoring the health of restored populations.

118 The Hudson River Estuary (HRE) provides a particularly interesting case study. This  
119 estuary includes multiple named water bodies in the brackish zone above and below New York  
120 City (Fig. 1). The HRE was once home to a highly abundant, economically valuable population  
121 of eastern oysters (Franz 1982; Kurlansky 2006). Overharvesting, water pollution, habitat  
122 destruction, and urbanization led to a precipitous decline of the population in the early 20<sup>th</sup>  
123 century (Kurlansky 2006; Mackenzie 2007). Today, a self-sustaining eastern oyster population is  
124 largely absent from the HRE except for a small remnant population in the Tappan Zee-  
125 Haverstraw Bay (TZHB) portion of the estuary near Irvington, NY (Fig. 1), where average  
126 salinity is low (3-12 psu) (Medley 2010; Starke et al. 2011). Recent unpublished data (Hare)

127 suggest that the TZHB population, while reproducing annually and self-recruiting consistently  
128 (Levinton et al. 2011; McFarland and Hare 2018; AKRF Inc. et al. 2021), is barely contributing  
129 any spat recruitment downstream that could help recover a self-sustaining population in lower  
130 parts of the estuary where water quality has improved and restoration efforts abound (Stinnette et  
131 al. 2018; McCann 2019). Based on published habitat suitability indices for *C. virginica*, the  
132 persistence and reproductive output of the TZHB population at very low salinities is enigmatic  
133 but provides hope that when restoration broodstock are needed, local native oysters will be  
134 considered a viable option. Our goal was to test the spawning capacity of TZHB oysters when  
135 transplanted to other parts of the estuary, and measure salinity effects on gametogenic timing.

136 To increase the generality of this study we compared gametogenic phenology of oysters  
137 from three population sources. Choosing an oyster source for restoration typically requires  
138 evaluation of potential trade-offs with respect to restoration efficacy, involving logistics,  
139 availability, cost, genetic diversity and relative fitness in the specific restoration environment  
140 (Hornick and Plough 2019; Hornick and Plough 2022). There currently are no relative  
141 performance data available on gametogenesis and phenology for oysters with distinct ancestries,  
142 even though these phenotypes can vary due to either local adaptations (genetic factors) or  
143 acclimation to distinct environments (epigenetic factors). Local native transplants (source 1:  
144 “Native”), recommended to maximize genetic diversity while minimizing maladaptive gene flow  
145 (Camara and Vadopalas 2009), involve transplants from naturally recruiting populations within  
146 the same estuary or region. For simplicity we will refer to naturally recruited oysters as “Native”,  
147 acknowledging that they are not necessarily pristine or genetically non-admixed with aquaculture  
148 lines at present or in the past. Native transplants can potentially be done at any post-settlement  
149 life stage, and do not involve hatchery propagation. Hatchery propagated stocks for restoration or

150 supplementation can derive from wild broodstock spawned in the hatchery (source 2:  
151 “Hatchery”) or from artificially selected lines used in aquaculture (source 3: “Aquaculture”).  
152 Most U.S. eastern seaboard hatcheries producing oysters sell primarily to aquaculture growers  
153 and do not typically work with wild broodstock, whereas restoration hatcheries and some  
154 research hatcheries spawn and propagate wild oysters for restoration (Hornick and Plough 2019).  
155 Thus, there can be many practical trade-offs affecting the decision to use one oyster source or  
156 another for restoration. A recent survey of New York/New Jersey projects in which oysters were  
157 seeded on restored benthic habitat revealed that 19 out of 20 had obtained seed from an out of  
158 state hatchery, with at least partial use of local broodstock in only 3 cases (McCann 2019).

159         Here, we compare the timing of gametogenic development and among-oyster synchrony  
160 for these three oyster ancestries along the salinity gradient in a temperate estuary. By quantifying  
161 gonad development at locations ranging from 3 to 30 psu, we test for the effects of salinity and  
162 ancestry on reproductive phenology. Our first hypothesis is that gametogenesis is delayed in the  
163 early-reproductive season (June) at sites with lower salinity relative to the higher salinity sites  
164 (Butler 1949; Shafee and Daoudi 1991; Shumway 1996; Honig et al. 2014; Volety et al. 2017).  
165 Comparing oyster ancestries, our hypothesis is that the Native line, from the local TZHB  
166 population, will demonstrate the most distinct phenology out of the three lines. More  
167 specifically, the long history of the TZHB population at an isolated, low salinity location  
168 (McFarland and Hare 2018), leads us to hypothesize that local adaptation or acclimation has  
169 reduced gametogenic suppression at low salinity, compared to the Aquaculture and Hatchery  
170 lines, both of which involved hatchery-produced seed (juveniles) from moderate salinity  
171 broodstock. Accordingly, the gametogenic delay predicted by hypothesis 1 is only expected in  
172 these latter two lines.



173

## 174 **METHODS**

### 175 **Study Species**

176 Eastern oysters (hereafter, oysters) are protandrous hermaphrodites, maturing first as  
177 males and later becoming females, and spending some period of the winter, depending on  
178 temperatures, with undifferentiated sex (Kennedy and Battle 1964). After sex differentiation,  
179 oysters begin gametogenesis, building and developing gonad tissue and gamete cells (eggs or  
180 sperm). The oyster is a synchronous spawner, triggered by temperatures greater than 20°C to  
181 release gametes into the water column as nearby individuals do the same (Loosanof and Davis  
182 1952; Kennedy and Battle 1964; Barber et al. 1991; Barber 1996; Mann et al. 2014). In  
183 temperate waters like the HRE, the reproductive period (gametogenesis and spawning) begins in  
184 the Spring and ends in the Fall. As it gets colder, oysters sometimes achieve a smaller fall spawn  
185 (Hayes and Menzel 1981) and then enter a quiescent stage in the winter during which gonads are  
186 dormant and mostly undifferentiated until the next spring (Kennedy and Battle 1964; Hayes and  
187 Menzel 1981; Mann et al. 2014).

188

### 189 **Outplant locations**

190 During a previous study initiated in 2016, juvenile oysters were deployed in cages along  
191 the estuarine salinity gradient to measure and compare survivorship and growth over 3 years. For  
192 this study we sampled lines from six of these outplant locations in both 2018 and 2019 (Fig. 1).  
193 The locations at Irvington Boat Club (IRV), Hastings on the Hudson (HH), and Yonkers Science  
194 Barge (SB) represent the low salinity region of the HRE (3-13 psu). The Redhook (RED)  
195 location represents an intermediate salinity (15-25 psu) in New York Harbor. Paerdegat Basin

196 (PGB) and Kingsborough Community College (KCC) are both in Jamaica Bay (connected to the  
197 lower HRE) and have the highest salinities (20-30 psu) (Fig. 1). Temperature and salinity were  
198 recorded as point data during each sampling trip at each location, along with semi-continuous  
199 measurements collected using YSI 600 OMS (YSI Inc. Yellow Springs, Ohio) sondes deployed  
200 at KCC and RED. Environmental data for HH, IRV and SB were obtained from Riverkeeper  
201 Incorporated's Water Quality Program in the Hudson River Estuary  
202 (<https://www.riverkeeper.org/water-quality/udson-river/>), the Hudson River Environmental  
203 Conditions Operating System (HRECOS) location at Piermont Pier (across the river from IRV),  
204 and the Center for the Urban River at Beczak (sonde deployed at SB) ([http://hudson.dl.stevens-](http://hudson.dl.stevens-tech.edu/hrecos/d/index.shtml)  
205 [tech.edu/hrecos/d/index.shtml](http://hudson.dl.stevens-tech.edu/hrecos/d/index.shtml)). Water quality data for PGB were obtained from a Harbor Water  
206 Quality dataset provided by the New York City Department of Environmental Protection  
207 (<https://data.cityofnewyork.us/Environment/Harbor-Water-Quality/5uug-f49n>).

208

## 209 **Oyster ancestry**

210 At each location, three distinct oyster lines were compared: Native, Hatchery, and  
211 Aquaculture. The 2018 Native line was obtained in August/September 2016 as natural spat  
212 recruits on bivalve shell deployed in the vicinity of the TZHB remnant population, then  
213 transplanted as 1 month old spat to various cage grow-out locations (Fig. 1). The Hatchery line  
214 represents wild genetic diversity from a moderate-salinity population with standard hatchery  
215 procedures imposing some genetic bottlenecking (Hornick and Plough 2019). The Hatchery line  
216 was produced by strip-spawning 12 males and 12 females collected from a native population in  
217 Edgartown Great Pond, a moderate-salinity (15-25 psu) lagoon in Martha's Vineyard,  
218 Massachusetts. The larvae were then cultured by the Martha's Vineyard Shellfish Group and sent

219 to the Cornell Cooperative Extension hatchery in Southold, New York, to set on micro-clutch  
220 and grow out in a nursery upwelling system for three weeks during August 2016 before  
221 deploying to sites across the HRE (Fig. 1). Larval culture was at 27-28 psu and the nursery was  
222 28 psu. Finally, a moderate-salinity aquaculture line was acquired as seed oysters (clutch-less  
223 spat) in August 2016 for outplant in the same cages. We estimated that all three lines were within  
224 approximately 2-3 months of the same age and were thus approximately two years old when  
225 sampled in 2018.

226 The 2019 samples consisted of the same Aquaculture line (now 3 years old) and TZHB  
227 native oysters dredged as adults (mean length =  $74.57 \pm 1.13$ mm) in June 2018. The dredged  
228 samples were immediately transplanted to experimental cages at the study sites (Fig. 1). Unlike  
229 the 2018 TZHB native oysters that developed from spat in the experimental cages at each study  
230 site (nearly full post-settlement opportunity for developmental plasticity), 2019 TZHB native  
231 oysters had acclimated as adults for 1 year at each study site before summer sampling in 2019.  
232 The 2019 Native cohort is recognized and considered a fourth treatment group because of their  
233 alternate collection and deployment strategy. Due to common ancestry, the 2019 cohort is still  
234 included in the discussion of ancestry effects on salinity.

235

### 236 **Oyster sampling and histology preparation**

237 Oysters were collected and sampled for histology three times during the summer of 2018  
238 (June 15-21, July 8-13 and August 8-13). Logistical and financial constraints limited collections  
239 to two dates in 2019 (July 28-August 1 and September 1-4), and Aquaculture individuals were  
240 not available at every location in 2019. The number of individuals that could be histologically  
241 analyzed was limited by oyster survivorship as well as funding. At each sampling site visit, shell

242 height was measured to the nearest millimeter using Mitutoyo Calipers (Mitutoyo America Co.,  
243 Aurora, IL, USA) from the hinge to the farthest edge of the shell prior to dissections.

244 In 2018, oysters were transported live in coolers with ambient HRE water to the Fort  
245 Totten Urban Field Station Laboratory in Queens, New York, (US Forest Service) where  
246 dissection and fixation of tissue sections was performed. In 2019, oysters were transported back  
247 to Cornell University live in coolers with ice packs, location specific HRE water, and aeration  
248 for processing the next day. After cleaning and shucking the oysters, a standardized 4mm cross  
249 section was taken to include reproductive tissue at the intersection of the labial palps and gills  
250 (Morales-Alamo and Mann 1989; Howard et al. 2004). The tissue cross section was placed in a  
251 labeled plastic cassette and preserved in Davidson's Fixative for 7 days and then 70% ethanol  
252 (Fisher et al. 1996). Samples were then sent to the Cornell University Animal Health Diagnostic  
253 Center for histology slide preparation with hematoxylin and eosin staining.

254

### 255 **Categorical gametogenesis analysis**

256 A common approach to measuring oyster reproductive status is with qualitative  
257 categorical scoring of gametogenesis progression from histological sections (Fisher et al. 1996).  
258 We scored the 5 stages defined by Lango-Reynoso et al. (2000), Barber (1996), and Kennedy &  
259 Battle (1964) (Table 1). Histology slides were examined with a compound microscope under  
260 100x total magnification to determine sex and gonad developmental stage. Gametogenesis was  
261 scored by KMG. A subset of oysters with borderline category assignments were also scored  
262 independently by MPH until consistent agreement was obtained.

263

### 264 **Dermo disease testing**

265 To test for the presence of *P. marinus* and measure intensity of infection, a small section  
266 of rectum tissue and approximately 0.5 cm<sup>2</sup> from the posterior gill tissue were removed from the  
267 same individuals on which histology was performed and placed in a culture tube containing 9.5  
268 mL of Ray's Thioglycollate Medium (RFTM; (Ray 1952; Ray 1954). Then, 0.5mL antibiotic  
269 solution (equivalent to 500 units of penicillin G and 500 units of streptomycin per mL of  
270 medium) and 50 µL of nystatin solution were added to the culture tube. The cultures were  
271 incubated at 25-26 °C in the dark for 5-7 days. After the incubation period, all tissues were  
272 removed from each tube and placed on a clean glass microscope slide. The tissue was macerated  
273 using a razor blade and 3-4 drops of Lugol's iodine was added before applying a cover slip. Each  
274 slide was immediately examined at 100-400x magnification for Dermo cells using the Mackin  
275 scale of 0 to 5, with 0 indicating no infection and 5 heavily infected (Mackin 1962; Dittman et al.  
276 2001). Because infections were so sparse, several slides were sent for confirmatory readings by  
277 Iris Burt at Rutgers Haskin Shellfish Research Lab, New Jersey. All individuals sampled in 2019  
278 for histology (n = 240) were tested for levels of *P. marinus* infection.

279

## 280 **Statistical Analyses**

281 The proportions of each gametogenic stage were calculated for each unique combination  
282 of location, month, and line. A set of ordinal logistic models were created to test the relationship  
283 between proportions of each gonad development stage and location, month, sex, and line for the  
284 2018 sampling year (Table 2). The moderate-salinity site (RED) had extremely low cumulative  
285 survivorship (by August 2018: Native- 3%, Hatchery- 0%, Aquaculture- 9%), resulting in a small  
286 sample size, so it was not included in the model. Given that complete or nearly complete  
287 gametogenic data were available for sites representing two environmental extremes in the

288 estuary, northern low salinity and southern high salinity, location was used as a proxy for salinity  
289 and included in all models. Month was included in all models because observations were made at  
290 this time interval during the typical main gametogenic season for oysters at this latitude  
291 (Kennedy and Battle 1964). All resulting possible interaction effects were included for 2018  
292 models. The 2019 model did not include a line variable because of limited data across ancestries,  
293 and because the Native line was based on adult transplants, not juvenile transplants like in 2018.  
294 Instead, 2019 Aquaculture data are described qualitatively, and only Native data were included  
295 in a location + month + location\*month model to best mirror the top ranked model in the 2018  
296 model selection (Table 2). Models were ranked in terms of AIC values with the criterion that  
297 well supported models have a delta AIC value < 2 (Burnham and Anderson 2002). Pairwise *post*  
298 *hoc* contrasts were performed using the ‘emmeans’ package (Lenth 2022). All statistical analyses  
299 were performed using R and RStudio (R Core Team 2018).

300 To quantify the synchrony of oysters, we calculated the Shannon-Wiener Diversity Index  
301 (hereafter, diversity index) for each unique combination of month, location, and line (Shannon  
302 and Weaver 1949; Tuomisto 2012). The formula, where  $p_i$  is the proportion of the total sample  
303 found to have each of the five gametogenic categories, captures evenness of gametogenic stages  
304 at a given time and place (Eqn. 1). Used this way, the index has an inverse relationship with  
305 synchrony such that as the index increases, the level of synchrony decreases. The diversity index  
306 was compared across locations and lines using generalized linear models (Table 3), following the  
307 formulas created for models 1-7 of the 2018 ordinal logistic modeling (Table 2). Models were  
308 ranked in terms of AIC values, but because this diversity metric lacks replication within sites and  
309 lines, *post hoc* analyses were not possible. These analyses were performed using R and RStudio  
310 (R Core Team 2018).

311 **Eqn 1.**  $H = -\sum p_i * \ln(p_i)$

312

## 313 **RESULTS**

### 314 **Environmental Conditions**

315 Across locations, temperature varied from 0.9 - 30.1°C throughout the year (Fig. 2).  
316 There was a seasonal flux in temperature, with only slight variation between years and among  
317 locations. Treated as two regions, the northern sites (IRV, HH, SB) and southern sites (PGB,  
318 KCC) saw little difference in average temperature during any sampling month (Fig. 2). Salinity  
319 variation (Fig. 2) was non-overlapping for northern (0.9-15.7 psu) and southern sites (18.4-30.1  
320 psu), supporting our use of these locations as proxy variables for low and high salinity,  
321 respectively. For each site, there was little variation in salinity between years, except at KCC and  
322 SB. In 2018, there was a gradual decrease in salinity at KCC (29.9 to 19.0 psu) between April  
323 and October, but in 2019 the trend was reversed, with salinity increasing from 23.8 to 30.1 psu in  
324 those months. The SB site had much lower spring salinity in 2019 than in 2018, but  
325 unfortunately insufficient oyster numbers remained at SB to allow an analysis for 2019.

326

### 327 **Gametogenic Development Stage**

328 Based on model selection criteria using AIC values, the top ranked model for 2018 was  
329 model 7: Location + month + line + location\*month + location\*line + month\*line (Table 2).  
330 Model 11 was also supported, differing from model 7 only in the inclusion of sex as a parameter.  
331 Sex was determined to be an uninformative parameter based on the criteria in (Arnold 2010), so  
332 the *post hoc* analysis was thus performed only for model 7. All sampling occasions in 2018 and  
333 2019 demonstrated either a roughly even or male-biased sex ratio (Table 4, Table S1). In August

334 of 2018 and in all 2019 samples, the Aquaculture line at PGB became 100% male. For the linear  
335 models of the diversity index, the top model was model 4: location + month + line + month\*line,  
336 indicating that location effects on synchrony were not interacting with line or month (Table 3).

337 In June 2018, only Native and Aquaculture could be compared between low and high  
338 salinity sites and in both cases gametogenic development had advanced more at low salinity. A  
339 greater proportion of individuals were mature or spawning at the low salinity site SB (75-80%)  
340 compared to the high salinity site PGB (0-20%; Native  $p < 0.0001$ ,  $n = 26$ ; Aquaculture  $p =$   
341  $0.0001$   $n = 26$ ; Hatchery could not be tested; Tables 4, 5). For both lines, early and late active  
342 stages were found in no more than 20% of individuals at low salinity site SB, yet at high salinity  
343 these stages were still 100% and 70% of Native and Aquaculture samples, respectively (Fig. 3a,  
344 g). The low salinity site HH showed the same trend in both oyster lines, with a near absence of  
345 the early active stage, but was less extreme (post hoc contrast significant only for the Native line,  
346 Table 5). For the Native line at high salinity, the complete lack of mature or later stage  
347 individuals contrasted with the diverse gametogenic stages observed in Aquaculture at high  
348 salinity, while patterns were similar among all three lines at low salinity (Fig. 3). One exception  
349 is that Native and Hatchery lines achieved some June spawning at low salinity, but Aquaculture  
350 only had spawners at higher salinity sites in June. The diversity index was highest, and thus  
351 synchrony was lowest, for the Aquaculture line in the South (Table 6).

352 In July, gametogenesis had not advanced much in any line at low salinity sites whereas at  
353 the moderate and higher salinity sites the proportion of spawning and reabsorbing stages had  
354 increased, where comparisons could be made to June. Thus, the June pattern of relatively  
355 advanced phenology at low salinity had reversed by July. Phenology again differed between low  
356 salinity SB+HH (average 0.9% spawning or reabsorbing individuals across the three lines and



357 two sites) and high salinity PGB (21%), with 4 out of 6 post hoc contrasts  $p < 0.05$  (table 5). An  
358 even greater proportion of spawning and/or reabsorbing stages was observed at the moderate  
359 salinity RED site than at high salinity PGB. In contrast, the two low salinity sites, SB and HH,  
360 both were dominated by late active and mature stages with almost no spawners (Table 5, Fig. 3b,  
361 e, h). Comparing the ancestry lines, the most striking difference was a slightly slower phenology  
362 in Aquaculture as indicated by 18.6% early active oysters averaged across all sites compared  
363 with 4.5% in Hatchery and Native combined (Fig. 3b, e, h). In fact, Aquaculture phenology went  
364 slightly backwards from June to July (more early active stage at all sites except PGB), even  
365 while spawning increased (Fig. 3h). All ancestry lines contained all 5 stages when tallied over all  
366 locations in July, but the among-location average diversity index was 1.2 for the Aquaculture  
367 line, indicating lower synchrony than Native and Hatchery with 0.84 and 0.62 diversity indices,  
368 respectively (Table 6). The July Hatchery line within-locale synchrony was higher (diversity  
369 index lower) than in any other month and line (Table 6).

370 In August, gametogenic progression to a later mix of stages was observed in all lines, at  
371 all sites. All three lines continued to show a higher proportion of later stages at higher salinity  
372 sites, dominated by spawning and reabsorption, relative to low salinity sites where late-active  
373 and mature stages were abundant (all  $p < 0.0026$ , Table 5,  $n = 51, 60, 58$ , for HH, SB, PGB,  
374 respectively all  $n = 20$ ; Table 4). Relative to July, low salinity sites in August progressed less than  
375 higher salinity sites except for the Aquaculture line. The only other line distinction of note was  
376 the Native oysters having 44% pre-spawning stages at high salinity PGB, whereas Hatchery and  
377 Aquaculture lines were  $> 85\%$  spawning and reabsorbing stages (Fig. 3 c, f, i). The diversity  
378 index was again overall highest for the Aquaculture line.

379           The 2019 data only included two months, and data collection was shifted 2 weeks later  
380 relative to 2018. Two sites were included for both the high salinity and low salinity regions, but  
381 complete data were only obtained for the Native line (adult transplants that had acclimated for a  
382 year in this case, as opposed to 2 years growth from spat on site for 2018 data). No Hatchery line  
383 oysters were available in 2019. At all sites oysters demonstrated gametogenic progression  
384 between the two sampling dates (Fig. 4). The *post hoc* contrasts between locations found little  
385 difference in stage proportions for either month (Table 7, Fig. 4a, b). This spatial gametogenic  
386 synchrony was coupled with temporal synchrony within sites based on low average diversity  
387 index values of 0.38 and 0.44 for July/August and early September, respectively (Table 8). At  
388 the high salinity sites where the Aquaculture and Native lines could be compared, the former had  
389 substantially more advanced gametogenic stages at the end of July (90+% spawning and  
390 reabsorption stage for Aquaculture, but only 15-45% for Native), but only modest differences  
391 with the same trend at the beginning of September.

392

### 393 **Dermo Disease**

394           Only 3 of 240 individuals had *P. marinus* spores detected (1.3%). All detected infections  
395 were in the Native line at PGB during the September sampling period. Two samples had Mackin  
396 intensity levels of 0.5, and another had a level of 1.

397

398

### 399 **DISCUSSION**

400           In one of the first studies to measure salinity effects on gametogenic phenology in a  
401 bivalve, and compare oyster lines with different ancestries, we found that in July and August of

402 2018 all three oyster lines had delayed gametogenic development at low salinity sites relative to  
403 high salinity sites, confirming our first hypothesis that low salinity would cause a delay.  
404 Surprisingly, the reverse was true in June 2018 for the two lines that could be compared in  
405 different salinities up and down river. June spawners only occurred at low salinity for Native  
406 oysters and contributed to a weighted average gonad index of 2.38-2.92 at low salinity sites,  
407 compared to only 1.46 at high salinity. The Aquaculture line showed this trend less dramatically,  
408 with weighted averages of 2.62 vs. 2.08 at low and high salinity, respectively, partly because the  
409 few June spawners were observed only at high and moderate salinity sites. The June pattern of  
410 more advanced oyster gonad index proportions at low salinity relative to high salinity was  
411 reversed in July due to gonad index stasis at low salinity versus progression toward spawning  
412 and reabsorption at high salinity.

413 Our second hypothesis, that the Native line would have the most distinct phenology  
414 characterized by earlier (less delayed) gametogenesis at low salinity, was rejected. All three lines  
415 had similar gonad index distributions at low salinity in June. Instead, the most striking distinction  
416 observed in the Native line was the extent of gonad index delay at high salinity in June, as  
417 indicated by zero oysters with a 'maturing' or later stage (weighted average gonad index 1.46),  
418 whereas at the same site the Aquaculture line had 25% maturing or spawning oysters (2.08). By  
419 July the Native oysters had compensated and had gonad index proportions similar to the other  
420 lines. The other line distinction of note in 2018 was the consistently higher diversity of gonad  
421 index stages in the Aquaculture line throughout the summer, indicating 30-48% less synchrony at  
422 any particular time or place.

423 Low variation in temperature among sites and minimal Dermo infections detected  
424 overall, highlight regional salinity differences as likely key to phenology variation among sites in

425 2018, but causal inferences are tentative because oyster cage outplant sites differed in other  
426 unmeasured ways. The 2019 sampling provided fewer spatial and line comparisons. Despite  
427 similar environmental conditions in the two years, 2019 patterns indicated greater synchrony and  
428 only slight salinity effects relative to 2018. We discuss these findings with reference to  
429 environmental variation and future restoration goals.

430

### 431 **Phenology variation**

#### 432 *Month*

433 The model that best explains 2018 gametogenic stage proportions includes month,  
434 location, line, and their interactions. Given the summer temperature variation (Fig. 2), month is  
435 the most obvious factor of expected importance since the species is considered to have locally  
436 synchronous spawning triggered by rising temperatures and conspecific spawning (Thompson et  
437 al. 1996; Bernard et al. 2011; Aranda et al. 2014). While some spawning occurred in each month  
438 (average proportion of spawners and reabsorbing individuals equal to 3.5%, 7.5%, and 46.8% in  
439 June, July, and August 2018, and 58.63% and 97.5% in July/August and September 2019), the  
440 spawning period in the HRE peaked in August and continued into September for these  
441 outplanted, caged oysters. An August peak for native TZHB oysters is supported by spat  
442 monitoring in the HRE, where the most abundant recruitment of spat (after a 2-3 week larval  
443 stage) has been observed in September (McFarland and Hare 2018). Our results suggest an  
444 extension of the spawning season for the HRE relative to nearby Long Island Sound where  
445 spawning peaks in July with spent oysters by August (Ford et al. 1990; Barber et al. 1991). Cold  
446 Adirondack mountain Spring melt waters in the Hudson River, or differences in phytoplankton

447 bloom timing and concentration, could be responsible for this geographic difference (Hofmann et  
448 al. 1992; Bernard et al. 2011).

449

### 450 *Salinity*

451 Our hypothesis of delayed gametogenic progression at lower salinities was only observed  
452 after the month of June, suggesting that the initiation of gametogenesis is less constrained by  
453 salinity variation, but that low summer salinity at northern sites relative to southern sites could be  
454 causing a delay at later gonad maturation stages. By the August 8-13 sampling period in 2018,  
455 northern low salinity sites (HH, SB) had fallen to near 5 psu and a majority of oysters were still  
456 in pre-spawning stages, a trend we expected based on literature suggesting reproductive  
457 depression caused by low salinity (Butler 1949; Shafee and Daoudi 1991; Shumway 1996; Honig  
458 et al. 2014; Volety et al. 2017). In contrast, the majority of oysters at the high salinity PGB site  
459 (approximately 25 psu) were spawned or reabsorbing for all three lines in August. These June  
460 and later Summer findings in Hudson River oysters are similar to those reported by McFarland et  
461 al. (2022) for eastern oysters in the Caloosahatchee River Estuary in Florida. They found over 15  
462 years of monthly sampling, across 5 sites ranging from 12 to 28 average salinity, that average  
463 gonad index at sites had a negative relationship with salinity. The lowest salinity site had the  
464 earliest gametogenic development; it had a 15-year average March gonad index of 2 while all  
465 other sites had averages below 1.5 (Fig. 7 in McFarland et al. 2022). We did not measure Spring  
466 gametogenesis in Hudson River oysters, but early initiation in the northern TZHB population  
467 seems unlikely given that it often experiences extended periods below salinity 5 during Spring  
468 (Levinton et al. 2011). Instead, we speculate that the advanced June gametogenesis observed  
469 here results from a rapid compensation for stressful Spring conditions. Whatever the mechanism,

470 the early gametogenic progression that produced some spawning in northern low salinity sites,  
471 coupled with a small proportion of spawners in August relative to high salinity sites, indicates  
472 that oysters at low salinity sites in the Hudson River also had relatively extended reproductive  
473 seasons similar to what was reported in the Caloosahatchee River ( McFarland et al. 2022).

474 Contrary to salinity effects observed in 2018, oysters analyzed in 2019 showed no  
475 significant differences in gonad index among sites. We don't know what interannual differences  
476 caused this change in phenology pattern along the salinity gradient, but the summer variation in  
477 salinity at northern sites was less in 2018, lacking a 5 psu drop in August or September (Fig. 2).  
478 Phenology comparisons between years are tenuous with respect to salinity contrasts because of  
479 the varied sampling dates, uneven oyster line availability, and altered Native outplant method.  
480 Factors such as food availability (Luna et al. 2000; Bernard et al. 2011) or local freshwater inputs  
481 (i.e. river discharge) (Baba et al. 1999; Wilson et al. 2005) could drive interannual variation, but  
482 such factors were outside the scope of this study. We recommend further study to determine the  
483 key interannual factors that can change reproductive phenology patterns so dramatically.

484 In terms of outplant method, it is notable that the 2019 Native dredged oysters were able  
485 to develop gametes at a variety of salinities only one year after transplant. Furthermore, the fact  
486 that both outplant strategies (outplanted as spat, outplanted dredged adults) resulted in oysters  
487 that were able to undergo a full reproductive cycle is encouraging for future restoration efforts  
488 considering the potential advantages associated with restoration using locally-adapted species  
489 (Hofmann et al. 1992; Camara and Vadopalas 2009; Flanagan et al. 2018; Hornick and Plough  
490 2019; Hornick and Plough 2022). This phenotypic plasticity is characteristic of oysters, but  
491 presumably has limits that need to be accounted for in restoration planning (Li et al. 2017; Li et  
492 al. 2018; Li et al. 2021).

493

494 *Ancestry*

495           The prediction that the Native line is adapted to low salinity and therefore would  
496 uniquely demonstrate a lack of reproductive depression at low salinity was only consistent with  
497 patterns observed in June 2018. Unfortunately, only comparisons between Native and  
498 Aquaculture strains were possible in June. The spatial contrast in gonad index between low and  
499 high salinity sites was much stronger in the Native line. The average proportion of early active  
500 and mature individuals for Natives in the north was 0.08 and 0.58 respectively, compared to 0.54  
501 and 0.0 at high salinity PGB. The overall gonad index average for Natives was higher at low  
502 salinity vs high salinity sites, 2.65 vs 1.46. This trend also was detectable in Aquaculture  
503 individuals but was less extreme (gonad index 2.62 in the north vs 2.08 at high salinity PGB).  
504 This suggests that TZHB Native oysters may have local adaptations that allow them to rapidly  
505 compensate for gametogenic delays experienced during very low Spring salinity levels, perhaps  
506 in response to overall metabolic depression (Gurr et al. 2020).

507           In August there was no single oyster line that stood out in terms of phenology or salinity  
508 effects, but there were differences in the gonad index progression with Native slowest (3.37  
509 average gonad index), Hatchery intermediate (3.54) and Aquaculture most advanced (3.82).  
510 These differences and trend are similar in the northern low salinity sites vs high salinity PGB,  
511 just shifted lower and higher than the overall average, respectively (3.03, 3.17, 3.50 in north;  
512 4.06, 4.30, 4.45 at PGB). This trend for 2018 indicates that under some conditions the Native line  
513 has a more extended reproductive season than the other oyster lines. A lengthening of the  
514 gametogenic period can be interpreted as a depression of gametogenesis that has been observed

515 by previous studies. (Butler 1949; Shafee and Daoudi 1991; Shumway 1996; Honig et al. 2014;  
516 Volety et al. 2017).

517 The 2019 samples allowed line comparisons only at high and low salinity sites. At these  
518 sites the gonad index differences between lines were not large, but the 2018 trend of a more  
519 extended reproductive season for the Native line was repeated in 2019. At the end of July gonad  
520 index averages for low and high salinity were 3.05 and 3.85 for Native, and 4.66 at high salinity  
521 sites for Aquaculture. In early September the difference was similar, 4.56 and 4.70 for Native,  
522 and 4.93 at high salinity sites for Aquaculture. In September, the transplanted Natives were  
523 majority post-spawning at low salinity sites, suggesting that the Natives had completed a cycle of  
524 gametogenesis and spawning.

525 One of the biggest differences among lines was in synchrony as measured by the  
526 diversity index. When averaged across all sites and over the entire 2018 season, the stage  
527 diversity in Native, Hatchery, and Aquaculture was 0.78, 0.81, and 1.05, respectively. Thus,  
528 Aquaculture was the outlier with less synchrony. We are not aware of other comparable data and  
529 can only speculate that long term culture and domestication led to relaxed selection (i.e., more  
530 random change under genetic drift) on sensory systems that contribute to synchrony under  
531 natural conditions. However, the same strain difference in synchrony was not observed in 2019,  
532 so this difference among strains probably relates to distinct expressions of genotype by  
533 environment plasticity (Eierman and Hare 2015).

534

### 535 **Conclusions and context for future oyster restoration**

536 This study demonstrated differences in reproductive phenology along the HRE salinity  
537 gradient that were associated with locality (low vs. high salinity regions) and oyster ancestry



538 line. These novel results in a temperate estuary suggest that reproductive phenology within an  
539 eastern oyster metapopulation is not simply a function of temperature, but also varies along the  
540 salinity gradient. The 2018 patterns were consistent with salinity effects on phenology  
541 documented elsewhere, but our interannual results caution against generalizing from the 2018  
542 patterns because genotype by environment interactions likely have strong effects. Additional  
543 replication is necessary to further understand genotype by environment effects. Future studies  
544 would be valuable that can experimentally link aspects of phenology with specific environmental  
545 drivers. In particular, future studies should sample in Spring as well as Summer because salinity  
546 effects seem to vary at different stages, and experimental designs to test for reproductive  
547 compensation would help evaluate the consequences of stressors.

548         Similar to previous reports in the HRE (Levinton et al. 2011; McFarland and Hare 2018),  
549 the near absence of Dermo infections in this study makes it reasonable to infer salinity effects  
550 separate from disease interactions. Further, the lack of Dermo presence across all sites supports  
551 the conclusion that disease is not the reason for the Native TZHB population's current isolation  
552 at low salinities, but further study would be necessary to confirm this.

553         The moderate salinity Aquaculture line studied here succeeded in spawning across  
554 diverse environments, attesting to its plasticity with respect to salinity. However, it also showed  
555 lower gametogenic within-site synchrony compared to the other lines, perhaps indicating  
556 domestication effects lowering a fitness-related trait. Selective breeding for commercially  
557 valuable traits can cause reduced genetic diversity and potentially reduced lifetime fitness in a  
558 natural environment, making aquaculture lines often the least desirable option for restoring  
559 oyster populations (Baggett et al. 2014). Enhancing or restoring a population with stocks that do  
560 not possess adequate genetic variation, or that have maladaptive variation, could be detrimental

561 to overall population fitness and diversity (Camara and Vadopalas 2009; Morvezen et al. 2016;  
562 Hornick and Plough 2019; Hughes et al. 2019; Hornick and Plough 2022).

563 With the growing threat of climate change, species inhabiting estuaries will likely be  
564 exposed to more frequent and extreme storms that can rapidly shift salinity to the edge of their  
565 tolerances. Investigating the effect of salinity on reproductive phenology is only one aspect of  
566 research that is essential to understand and possibly mitigate the potential effects of climate  
567 change on estuarine oyster populations. The Native TZHB population is at the edge of habitable  
568 salinity variation with little quality habitat to expand to upstream (Starke et al. 2011), and it is  
569 not known to occur in any habitat further south except as sparse spat (new recruits; Medley  
570 2010) or adults on pilings in Hudson River Park, Manhattan (Fitzgerald et al. 2020). The ability  
571 of TZHB oysters to survive and reproduce at moderate salinities, as evidenced in this study,  
572 indicates that its continued isolation north of New York City is likely a function of  
573 hydrodynamics and/or stressful downstream water quality for the mobile larval stage. If poor  
574 water quality in the lower HRE amplifies larval mortality above typical levels, then further water  
575 quality improvements will be needed before restoration with any oyster line has a chance of  
576 establishing a self-sustaining metapopulation (i.e., promoting the full life cycle) in the lower  
577 estuary. Assuming adequate water quality, transplantation of adults or spat to seed hard  
578 substrates in moderate salinity habitats could help protect the population from climate change  
579 effects by reestablishing metapopulation dynamics (Lipcius et al. 2008). Here, results  
580 demonstrate that the TZHB population provides a valuable resource for transplant restoration  
581 strategies that could leverage and expand local genetic variation.

582 **TABLES**

583 **Table 1.** Descriptions of gametogenic development stages for *Crassostrea virginica* (Kennedy  
584 and Battle 1964; Barber 1996; Lango-Reynoso et al. 2000)

| Stage Number | Stage Title  | Description                                                                                                                                                                                         |
|--------------|--------------|-----------------------------------------------------------------------------------------------------------------------------------------------------------------------------------------------------|
| 0            | Inactive     | Follicles are nonexistent or elongated, with walls consisting or undifferentiated germinal epithelium. Sex cannot be determined                                                                     |
| 1            | Early-active | Follicles contain oogonia or spermatogonia and primary oocytes or spermatocytes (no free oocytes or spermatozoa)                                                                                    |
| 2            | Late-active  | Secondary (free) oocytes and spermatocytes predominate in the follicles; there are some spermatozoa                                                                                                 |
| 3            | Mature       | Mature gametes (ova or spermatozoa) totally filling the follicles; presence of ova with distinct nucleus and nucleolus, spermatozoa oriented with tails toward the follicle lumen                   |
| 4            | Spawned      | Follicles have gaps devoid of gametes, although numerous gametes may still remain, follicle walls may be broken. Redevelopment as evidenced by increased number of primary oocytes or spermatocytes |
| 5            | Reabsorbing  | Follicles have a shrunken appearance and contain numerous phagocytes and products of reabsorption; gametes are refractory, and development is not evident                                           |

585

586 **Table 2.** Results of 2018 model selection of ordinal logistic models for gametogenic

587 development stages. Models are ranked in terms of AIC values

| Model # | Description                                                                 | Df | Log Likelihood | AIC    | Delta AIC | Weight |
|---------|-----------------------------------------------------------------------------|----|----------------|--------|-----------|--------|
| 7       | Location + month + line + location*month + location*line + month*line       | 22 | -496.620       | 1037.2 | 0.00      | 0.504  |
| 11      | Location + month + line + location*month + location*line + month*line + sex | 23 | -496.217       | 1038.4 | 1.19      | 0.277  |
| 2       | Location + month + location*month                                           | 12 | -508.137       | 1040.3 | 3.03      | 0.110  |
| 5       | Location + month + line + location*month                                    | 14 | -506.842       | 1041.7 | 4.45      | 0.055  |
| 9       | Location + month + location*month + sex                                     | 23 | -507.850       | 1041.7 | 4.46      | 0.054  |
| 4       | Location + month + line + month*line                                        | 14 | -533.466       | 1094.9 | 57.69     | 0.000  |
| 6       | Location + month + line + location*line                                     | 12 | -534.097       | 1096.2 | 58.95     | 0.000  |
| 3       | Location + month + line                                                     | 10 | -538.836       | 1097.7 | 60.43     | 0.000  |
| 10      | Location + month + line + sex                                               | 11 | -538.836       | 1099.7 | 62.43     | 0.000  |

|   |                        |   |          |        |       |       |
|---|------------------------|---|----------|--------|-------|-------|
| 1 | location + month       | 8 | -541.883 | 1099.8 | 62.53 | 0.000 |
| 8 | location + month + sex | 9 | -541.883 | 1101.8 | 64.53 | 0.000 |

588

589 **Table 3.** Results of 2018 model selection of generalized linear models of Shannon Diversity

590 Index. Models are ranked in terms of AIC values

| Model # | Description                                                           | Df | Log Likelihood | AIC  | Delta AIC | Weight |
|---------|-----------------------------------------------------------------------|----|----------------|------|-----------|--------|
| 4       | Location + month + line + month*line                                  | 12 | 6.422          | 11.2 | 0.0       | 0.745  |
| 1       | location + month                                                      | 6  | -1.699         | 15.4 | 4.24      | 0.089  |
| 3       | Location + month + line                                               | 8  | 0.199          | 15.6 | 4.44      | 0.081  |
| 7       | Location + month + line + location*month + location*line + month*line | 20 | 12.032         | 15.9 | 4.78      | 0.086  |
| 2       | Location + month + location*month                                     | 10 | -0.444         | 20.9 | 9.73      | 0.006  |
| 5       | Location + month + line + location*month                              | 12 | 1.555          | 20.9 | 9.73      | 0.006  |
| 6       | Location + month + line + location*line                               | 12 | 1.358          | 21.3 | 10.13     | 0.005  |

591

592

593 **Table 4.** Sex ratios of oysters sampled for histology (# females: # males). Locations are listed by

594 latitude, from north to south. Locality abbreviations explained in Fig. 1 legend and in the

595 text. Native oysters in 2019 were dredged and outplanted as adults

| Location   | Line        | June 2018 | July 2018 | August 2018 | July/August 2019 | September 2019 |
|------------|-------------|-----------|-----------|-------------|------------------|----------------|
| <b>IRV</b> | Native      | -         | -         | -           | 11:9             | 11:9           |
| <b>HH</b>  | Aquaculture | 3:10      | 7:13      | 7:13        | -                | -              |
|            | Hatchery    | 3:10      | 5:7       | 4:8         | -                | -              |
|            | Native      | 3:10      | 10:10     | 6:13        | 9:11             | 5:15           |
| <b>SB</b>  | Aquaculture | 4:9       | 5:15      | 5:15        | -                | -              |
|            | Hatchery    | 3:10      | 8:12      | 6:14        | -                | -              |
|            | Native      | 2:11      | 7:13      | 7:13        | -                | -              |
| <b>RED</b> | Aquaculture | 2:8       | 1:19      | 2:18        | -                | -              |
|            | Hatchery    | -         | -         | -           | -                | -              |
|            | Native      | -         | -         | 1:5         | -                | -              |
| <b>PGB</b> | Aquaculture | 2:11      | 5:15      | 0:20        | 0:20             | 0:20           |
|            | Hatchery    | -         | 6:12      | 4:16        | -                | -              |

|            |             |     |      |      |      |      |
|------------|-------------|-----|------|------|------|------|
|            | Native      | 5:8 | 4:16 | 5:13 | 7:13 | 4:16 |
| <b>KCC</b> | Aquaculture | -   | -    | -    | 4:16 | 7:13 |
|            | Native      | -   | -    | -    | 9:11 | 4:16 |

596

597

598 **Table 5.** Results of pairwise *post hoc* test (p-values) for the 2018 model comparing locations

599 within each month, for each line. Locality abbreviations explained in Fig. 1 legend and in

600 the text

| <b>a.) June</b> | Native | Hatchery | Aquaculture |
|-----------------|--------|----------|-------------|
| HH-SB           | 0.3761 | 0.0076   | 0.0347      |
| HH-PGB          | 0.0002 | N/A      | 0.1102      |
| SB-PGB          | <.0001 | N/A      | 0.0001      |

601

| <b>b.) July</b> | Native | Hatchery | Aquaculture |
|-----------------|--------|----------|-------------|
| HH-SB           | 0.4015 | 0.7865   | 0.9991      |
| HH-PGB          | 0.4366 | 0.0581   | 0.0010      |
| SB-PGB          | 0.0420 | 0.1531   | 0.0018      |

602

| <b>c.) August</b> | Native | Hatchery | Aquaculture |
|-------------------|--------|----------|-------------|
| HH-SB             | 0.9410 | 0.3073   | 0.6345      |
| HH-PGB            | 0.0010 | <.0001   | <.0001      |
| SB-PGB            | 0.0002 | 0.0026   | <.0001      |

603

604 **Table 6.** Shannon-Wiener Diversity Index values for each unique combination of month,

605 location, and line for 2018. Locality abbreviations explained in Fig. 1 legend and in the

606 text

|             | <b>Location</b> | <b>Native</b> | <b>Hatchery</b> | <b>Aquaculture</b> |
|-------------|-----------------|---------------|-----------------|--------------------|
| <b>June</b> | HH              | 0.911         | 1.073           | 0.690              |
|             | SB              | 0.937         | 0.790           | 0.687              |
|             | RED             | -             | -               | 1.280              |
|             | PBG             | 0.690         | -               | 1.199              |
| <b>July</b> | HH              | 0.562         | 0.888           | 0.999              |
|             | SB              | 0.999         | 0.423           | 1.106              |
|             | RED             | 0.673         | -               | 1.476              |

|               |     |       |       |       |
|---------------|-----|-------|-------|-------|
|               | PBG | 1.141 | 0.557 | 1.234 |
| <b>August</b> | HH  | 0.874 | 0.824 | 1.345 |
|               | SB  | 0.708 | 0.824 | 1.345 |
|               | RED | -     | -     | 0.441 |
|               | PBG | 0.349 | 1.07  | 0.824 |

607

608

609 **Table 7.** Results of pairwise *post hoc* test (p-values) for the 2019 model comparing locations

610 within each month for the Native line. Locality abbreviations explained in Fig. 1 legend

611 and in the text

|         | July/Aug. | Sept.  |
|---------|-----------|--------|
| IRV-HH  | 0.9998    | 1.00   |
| IRV-PGB | 0.9928    | 0.9998 |
| IRV-KCC | 0.1817    | 1.00   |
| HH-PGB  | 1.00      | 0.9976 |
| HH-KCC  | 0.3711    | 0.9992 |
| PGB-KCC | 0.5431    | 1.00   |

612

613 **Table 8.** Shannon-Wiener Diversity Index values for each unique combination of month,

614 location, and line for 2019. Locality abbreviations explained in Fig. 1 legend and in the

615 text. \*Native oysters dredged and outplanted as adults

|                 | Location | Native* | Aquaculture |
|-----------------|----------|---------|-------------|
| <b>July/Aug</b> | IRV      | 0.199   | -           |
|                 | HH       | 0.381   | -           |
|                 | PGB      | 0.263   | 0.525       |
|                 | KCC      | 0.680   | 0.276       |
| <b>Sept</b>     | IRV      | 0.491   | -           |
|                 | HH       | 0.514   | -           |
|                 | PGB      | 0.376   | 0.263       |
|                 | KCC      | 0.387   | 0           |

616 **FIGURES**

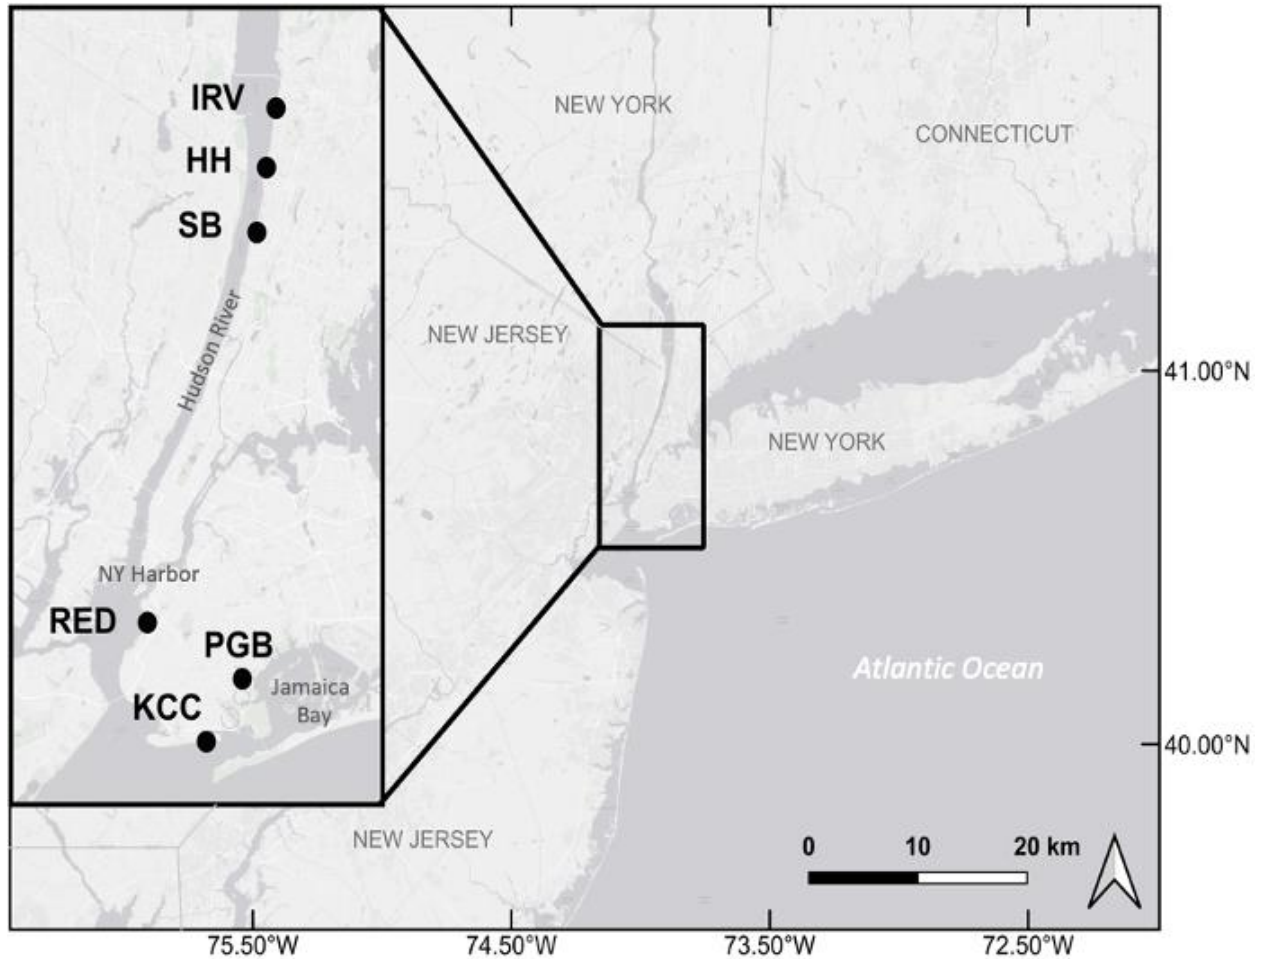

617

618 **Fig. 1** Map of sampling locations on the Hudson River Estuary in New York, United States.

619 Sampling locations are in three named regions of the estuary: Irvington Boat Club (IRV),

620 Hastings on the Hudson (HH), and Yonkers Science Barge (SB) are north of New York

621 City in the “Lower Hudson River”, also known as the North River; Redhook (RED) is in

622 New York Harbor; Paerdegat Basin (PGB), and Kingsborough Community College

623 (KCC) are both in Jamaica Bay.

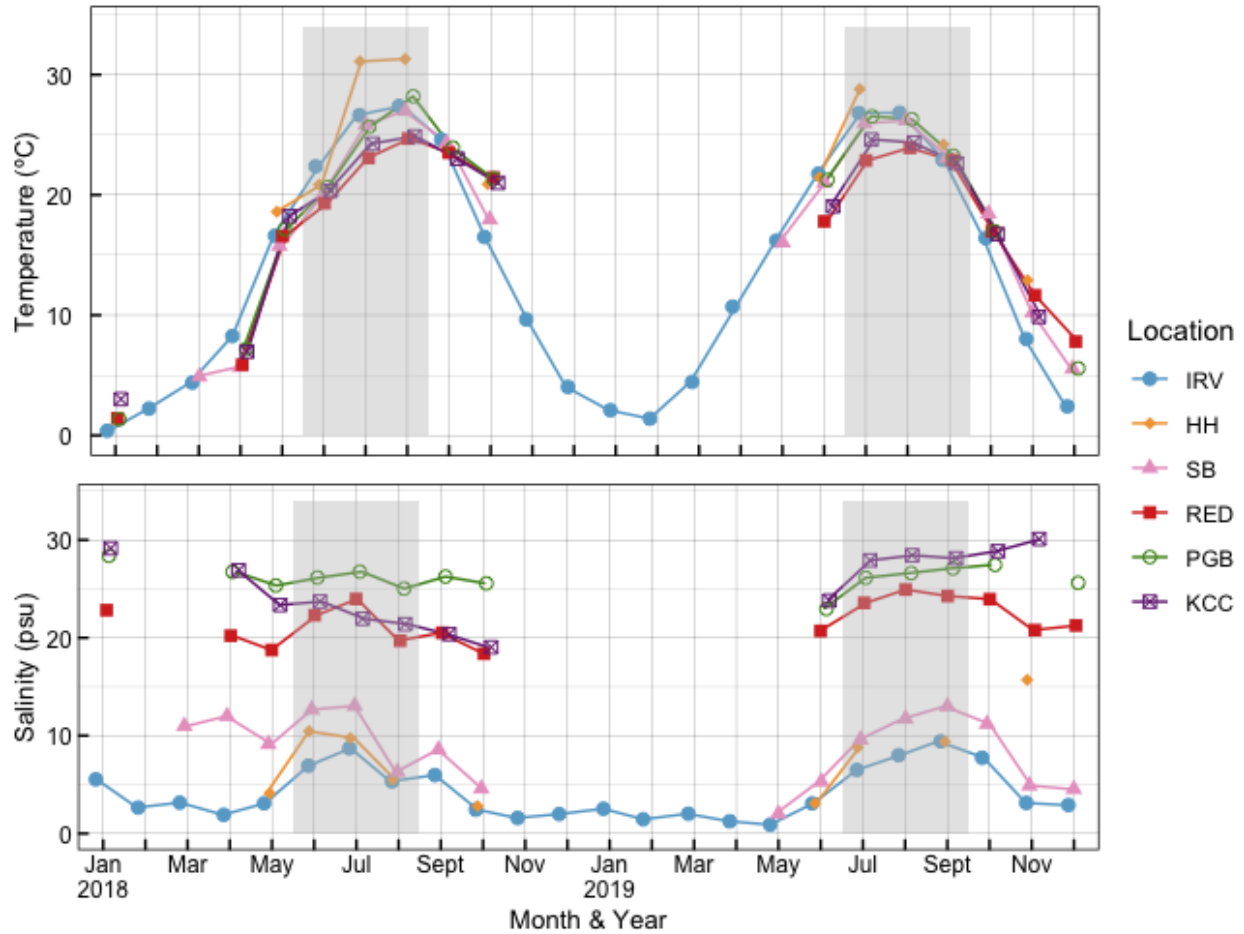

624

625 **Fig. 2** Temperature and salinity patterns in the Hudson River Estuary from January 2018 -

626 December 2019. Shaded areas indicate sampling periods. Locations are listed in order by

627 latitude, from north to south. Locality abbreviations explained in Fig. 1 legend and in the

628 text



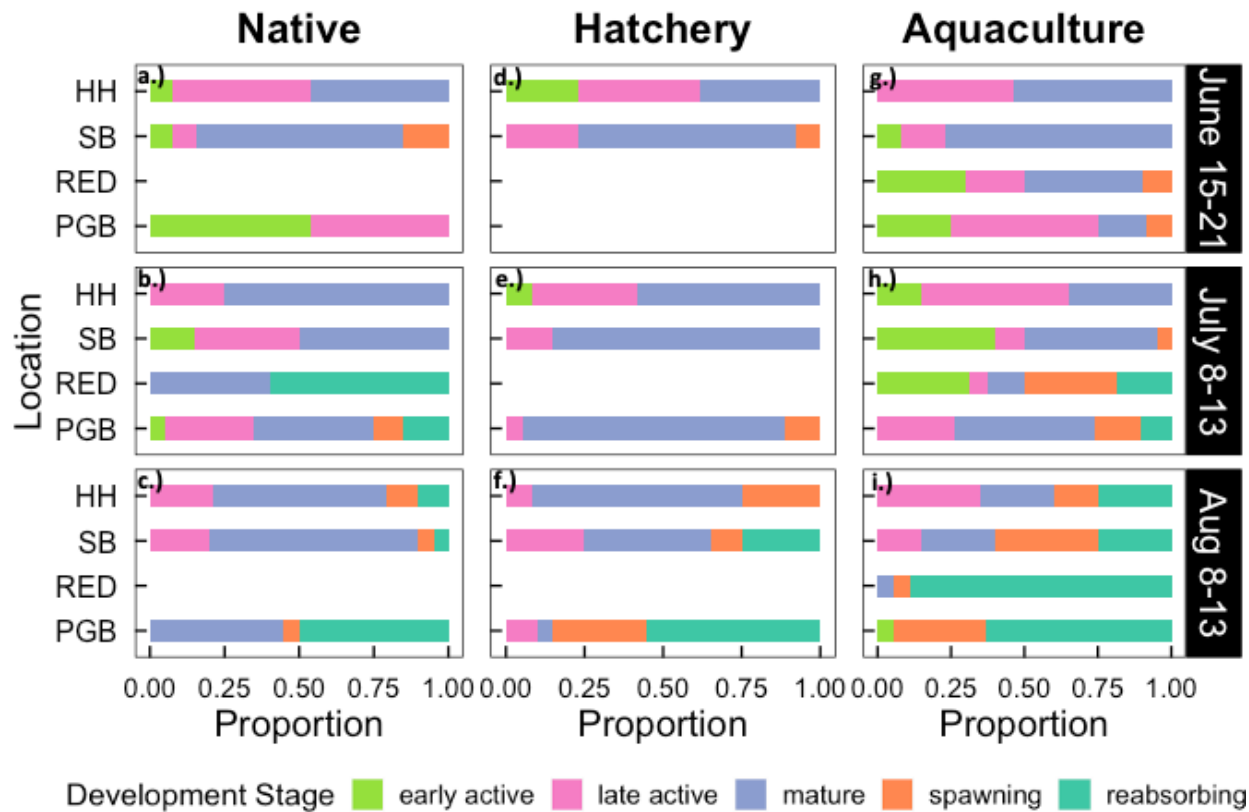

629

630

631

632

633

634

**Fig 3.** Gametogenic development stage proportions from 2018 oyster samples by month and location. a-c.) Native line. d-f.) Hatchery line. g-i.) Aquaculture line. Sample sizes were n=13 in June and n=20 in July and August with some exceptions (see Table 2). Locations are listed in order by latitude, from north to south. Locality abbreviations explained in Fig. 1 legend and in the text

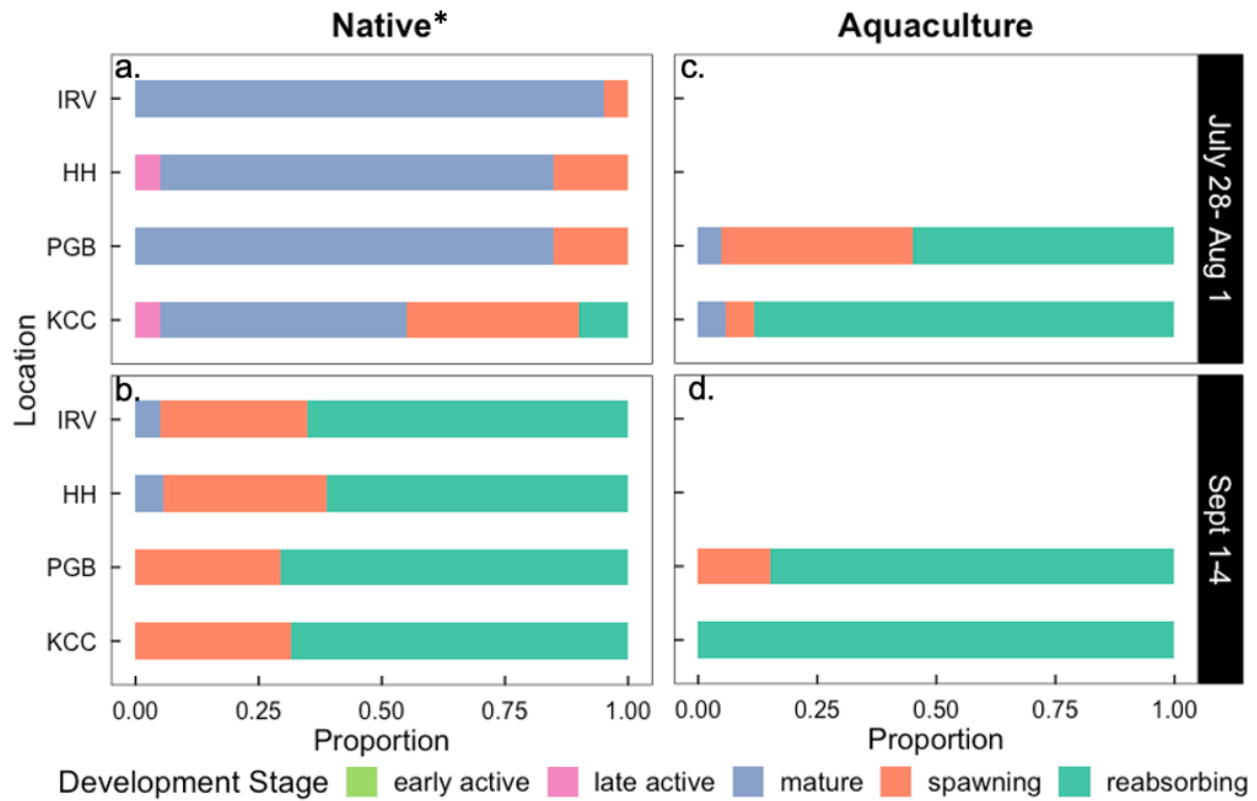

635

636

637

638

639

640

**Fig 4.** Gametogenic development stage proportions for 2019 oyster samples by month and line, including Native line (a-b.) and Aquaculture line (c-d.). N=20 in all cases. Locations are listed in order by latitude, from north to south. Locality abbreviations explained in Fig. 1 legend and in the text. \*Native oysters dredged and outplanted as adults

641 **ACKNOWLEDGEMENTS**

642 Thanks to Harmony Borchardt-Wier, Iris Burt, Sarah Gisler, Hannah Hartung, and Tiffany  
643 Medley for their support in this research effort through field work assistance and/or methods and  
644 data analysis consults. We appreciate the careful oyster husbandry contributed by Amandine Hall  
645 at Martha's Vineyard Shellfish Group and by Gregg Rivara at the Suffolk County Marine  
646 Environmental Learning Center hatchery. Pete Malinowski generously provided some of the  
647 oysters analyzed in this study. Thanks to Captain Jim Nickels, Monmouth University, for a  
648 successful oyster dredging trip in 2018, ultimately allowing for this experiment to continue into  
649 2019. Advice provided by Cornell Statistical Consulting Unit on data analysis and display was  
650 greatly appreciated. This study would not have been possible without housing and lab space  
651 provided by the U.S. Forest Service Fort Totten Urban Field Station. Funding was provided by a  
652 Tibor T. Polgar Fellowship from the Hudson River Foundation, a grant from the NYS Water  
653 Resources Institute, and a grant from the Cornell University College of Agriculture and Life  
654 Sciences Charitable Trust. This work was only possible through the generosity of location hosts  
655 that kept experimental oyster cages secure: Irvington Boat Club, Hastings on Hudson  
656 Neighborhood Association, Groundwork Hudson Valley Science Barge, Inwood Canoe Club,  
657 Red Hook Barge Museum, Sebago Canoe Club, and Kingsborough Community College.

658 **REFERENCES**

- 659 Able, K. 2005. A re-examination of fish estuarine dependence: evidence for connectivity  
660 between estuarine and ocean habitats. *Estuarine, Coastal and Shelf Science* 64: 5–17.  
661 <https://doi.org/10.1016/j.ecss.2005.02.002>.
- 662 AKRF Inc., Hudson River Foundation, Billion Oyster Project, and University of New  
663 Hampshire. 2021. *2020 Post-Construction Oyster Monitoring Final Report*. PMIS  
664 Document Control No. TA\_NYSDEC\_03527\_RPT\_ENV.
- 665 Andrews, J. D. 1988. Epizootiology of the disease caused by the oyster pathogen *Perkinsus*  
666 *marinus* and its effects on the oyster industry. *American Fisheries Society Species*  
667 *Publication* 18. American Fisheries Society: 47–63.
- 668 Aranda, D. A., M. E. Díaz, F. L. Reynoso, T. Brulé, J. Montero, and E. B. Cárdenas. 2014.  
669 Reproductive Strategies of the Eastern Oyster *Crassostrea virginica* (Gmelin 1791) in  
670 Tropical Lagoons of the Mexican Gulf of Mexico. *Journal of Shellfish Research* 33: 145–  
671 152. <https://doi.org/10.2983/035.033.0114>.
- 672 Arnold, T. W. 2010. Uninformative parameters and model selection using Akaike’s Information  
673 Criterion. *The Journal of Wildlife Management* 74: 1175–1178.  
674 <https://doi.org/10.1111/j.1937-2817.2010.tb01236.x>.
- 675 Baba, K., M. Tada, T. Kawajiri, and Y. Kuwahara. 1999. Effects of temperature and salinity on  
676 spawning of the brackish water bivalve *Corbicula japonica* in Lake Abashiri, Hokkaido,  
677 Japan. *Marine Ecology Progress Series* 180: 213–221.  
678 <https://doi.org/10.3354/meps180213>.
- 679 Baggett, L. P., S. P. Powers, R. D. Brumbaugh, L. D. Coen, B. DeAngelis, J. Greene, B.  
680 Hancock, and S. Morlock. 2014. *Oyster habitat restoration monitoring and assessment*  
681 *handbook*. Arlington, VA, USA: The Nature Conservancy.
- 682 Barber, B. J. 1996. Gametogenesis of eastern oysters, *Crassostrea virginica* (Gmelin, 1791) and  
683 Pacific oysters, *Crassostrea gigas* (Thunberg, 1793) in disease-endemic lower  
684 Chesapeake Bay. *Journal of Shellfish Research* 2: 285–290.
- 685 Barber, B. J., S. E. Ford, and R. N. Wargo. 1991. Genetic variation in the timing of gonadal  
686 maturation and spawning of the eastern oyster, *Crassostrea virginica* (Gmelin). *The*  
687 *Biological Bulletin* 181: 216–221. <https://doi.org/10.2307/1542092>.
- 688 Barnes, T. K., A. K. Volety, K. Chartier, F. J. Mazzotti, and L. Pearlstine. 2007. A habitat  
689 suitability index model for the eastern oyster (*Crassostrea virginica*), a tool for  
690 restoration of the Caloosahatchee Estuary, Florida. *Journal of Shellfish Research* 26:  
691 949–959. [https://doi.org/10.2983/0730-8000\(2007\)26\[949:AHSIMF\]2.0.CO;2](https://doi.org/10.2983/0730-8000(2007)26[949:AHSIMF]2.0.CO;2).
- 692 Beck, M. W., R. D. Brumbaugh, L. Airoidi, A. Carranza, L. D. Coen, C. Crawford, O. Defeo, et  
693 al. 2011. Oyster reefs at risk and recommendations for conservation, restoration, and  
694 management. *Bioscience* 61: 107–116. <https://doi.org/10.1525/bio.2011.61.2.5>.
- 695 Bernard, I., G. de Kermoisan, and S. Pouvreau. 2011. Effect of phytoplankton and temperature  
696 on the reproduction of the Pacific oyster *Crassostrea gigas*: Investigation through DEB  
697 theory. *Journal of Sea Research* 66: 349–360.  
698 <https://doi.org/10.1016/j.seares.2011.07.009>.
- 699 Bourlès, Y., M. Alunno-Bruscia, S. Pouvreau, G. Tollu, D. Leguay, C. Arnaud, P. Gouletquer,  
700 and S. A. L. M. Kooijman. 2009. Modelling growth and reproduction of the Pacific  
701 oyster *Crassostrea gigas*: Advances in the oyster-DEB model through application to a

- 702 coastal pond. *Journal of Sea Research* 62: 62–71.  
703 <https://doi.org/10.1016/j.seares.2009.03.002>.
- 704 Bricker, S. B., R. E. Grizzle, P. Trowbridge, J. M. Rose, J. G. Ferreira, K. Wellman, C. Zhu, et  
705 al. 2020. Bioextractive removal of nitrogen by oysters in Great Bay Piscataqua River  
706 Estuary, New Hampshire, USA. *Estuaries and Coasts* 43: 23–38.  
707 <https://doi.org/10.1007/s12237-019-00661-8>.
- 708 Burnham, K. P., and D. R. Anderson. 2002. *Model Selection and Multimodel Inference: A*  
709 *Practical Information-Theoretic Approach*. 2nd ed. New York: Springer-Verlag.  
710 <https://doi.org/10.1007/b97636>.
- 711 Butler, P. A. 1949. Gametogenesis in the oyster under conditions of depressed salinity. *The*  
712 *Biological Bulletin* 96: 263–269. <https://doi.org/10.2307/1538361>.
- 713 Camara, M. D., and B. Vadopalas. 2009. Genetic aspects of restoring Olympia oysters and other  
714 native bivalves: balancing the need for action, good intentions, and the risks of making  
715 things worse. *Journal of Shellfish Research* 28: 121–145.  
716 <https://doi.org/10.2983/035.028.0104>.
- 717 Chu, F. L. E., and J. F. La Peyre. 1993. *Perkinsus marinus* susceptibility and defense-related  
718 activities in eastern oysters *Crassostrea virginica*. *Diseases of Aquatic Organisms* 16:  
719 223–234. <https://doi.org/10.3354/dao016223>.
- 720 Coen, L. D., R. D. Brumbaugh, D. Bushek, R. Grizzle, M. W. Luckenbach, M. H. Posey, S. P.  
721 Powers, and S. G. Tolley. 2007. Ecosystem services related to oyster restoration. *Marine*  
722 *Ecology Progress Series* 341: 303–307. <https://doi.org/10.3354/meps341303>.
- 723 Davis, H. C., and A. Calabrese. 1964. Combined effects of temperature and salinity on  
724 development of eggs and growth of larvae of *M. mercenaria* and *C. virginica*. *Fisheries*  
725 *Bulletin*: 643–655.
- 726 Dittman, D. E., S. E. Ford, and D. K. Padilla. 2001. Effects of *Perkinsus marinus* on  
727 reproduction and condition of eastern oyster, *Crassostrea virginica*, depend on timing.  
728 *Journal Of Shellfish Research* 20: 1025–1034.
- 729 Eierman, L. E., and M. P. Hare. 2015. Reef-specific patterns of gene expression plasticity in  
730 eastern oysters (*Crassostrea virginica*). *Journal of Heredity* 107: 90–100.
- 731 Fisher, W. S., J. T. Winstead, L. M. Oliver, H. L. Edmiston, and G. O. Bailey. 1996.  
732 Physiological variability of eastern oysters from Apalachicola Bay, Florida. *Journal Of*  
733 *Shellfish Research* 15: 543–553.
- 734 Fitzgerald, A. M., C. Roble, M. Krupitsky, M. Ramirez, and C. Giraldo. 2020. *Invertebrate*  
735 *colonization of pier pilings in the Hudson River*. Final Report to Hudson River Park  
736 Trust.
- 737 Flanagan, S. P., B. R. Forester, E. K. Latch, S. N. Aitken, and S. Hoban. 2018. Guidelines for  
738 planning genomic assessment and monitoring of locally adaptive variation to inform  
739 species conservation. *Evolutionary Applications* 11: 1035–1052.  
740 <https://doi.org/10.1111/eva.12569>.
- 741 Ford, S. E., A. J. Figueras, and H. H. Haskin. 1990. Influence of selective breeding, geographic  
742 origin, and disease on gametogenesis and sex ratios of oysters, *Crassostrea virginica*,  
743 exposed to the parasite *Haplosporidium nelsoni* (MSX). *Aquaculture* 88: 285–301.  
744 [https://doi.org/10.1016/0044-8486\(90\)90155-G](https://doi.org/10.1016/0044-8486(90)90155-G).
- 745 Franz, D. R. 1982. An historical perspective on molluscs in lower New York Harbor, with  
746 emphasis on oysters. In *Ecological Stress and the New York Bight: Science and*

- 747 *Management*, ed. G. F. Mayer. Columbia, South Carolina: Estuarine Research  
748 Foundation.
- 749 Gurr, S. J., B. Vadopalas, S. B. Roberts, and H. M. Putnam. 2020. Metabolic recovery and  
750 compensatory shell growth of juvenile Pacific geoduck *Panopea generosa* following  
751 short-term exposure to acidified seawater. *Conservation Physiology* 8: coaa024.  
752 <https://doi.org/10.1093/conphys/coaa024>.
- 753 Hayes, P. F., and R. W. Menzel. 1981. The reproductive cycle of early setting *Crassostrea*  
754 *virginica* (Gmelin) in the northern Gulf of Mexico, and its implications for population  
755 recruitment. *The Biological Bulletin* 160: 80–88. <https://doi.org/10.2307/1540902>.
- 756 Hofmann, E. E., E. N. Powell, J. Klinck, and E. A. Wilson. 1992. Modeling oyster populations.  
757 III. Critical feeding periods, growth and reproduction. *Journal of Shellfish Research* 11:  
758 399–416.
- 759 Honig, A., M. L. Peyre, and J. Supan. 2014. Effects of low and high salinity regimes on seasonal  
760 gametogenesis of the ribbed mussel *Geukensia granosissima* in coastal Louisiana, USA.  
761 *Sexuality and Early Development in Aquatic Organisms* 1: 75–82.  
762 <https://doi.org/10.3354/sedao00008>.
- 763 Hornick, K. M., and L. Plough. 2019. Tracking genetic diversity in a large-scale oyster  
764 restoration program: effects of hatchery propagation and initial characterization of  
765 diversity on restored vs. wild reefs. *Heredity* 123. <https://doi.org/10.1038/s41437-019-0202-6>.
- 767 Hornick, K. M., and L. V. Plough. 2022. Genome-wide analysis of natural and restored eastern  
768 oyster populations reveals local adaptation and positive impacts of planting frequency  
769 and broodstock number. *Evolutionary Applications* 15: 40–59.  
770 <https://doi.org/10.1111/eva.13322>.
- 771 Howard, D. W., E. J. Lewis, J. Keller, and C. S. Smith. 2004. *Histological techniques for marine*  
772 *bivalve mollusks and crustaceans*. Technical Memorandum. NOAA National Oceanic  
773 Service.
- 774 Hughes, A. R., T. C. Hanley, J. E. Byers, J. H. Grabowski, T. McCrudden, M. F. Piehler, and D.  
775 L. Kimbro. 2019. Genetic diversity and phenotypic variation within hatchery-produced  
776 oyster cohorts predict size and success in the field. *Ecological Applications* 29.  
777 <https://doi.org/10.1002/eap.1940>.
- 778 Kennedy, A. V., and H. I. Battle. 1964. Cyclic changes in the gonad of the American oyster,  
779 *Crassostrea virginica* (Gmelin). *Canadian Journal of Zoology* 42: 305–321.  
780 <https://doi.org/10.1139/z64-029>.
- 781 Kurlansky, M. 2006. *The Big Oyster: History on the Half Shell*. New York City, New York:  
782 Penguin Random House.
- 783 La Peyre, M. K., J. Geaghan, G. A. Decossas, and J. F. La Peyre. 2016. Analysis of  
784 environmental factors influencing salinity patterns, oyster growth, and mortality in lower  
785 Breton Sound Estuary, Louisiana using 20 years of data. *Journal of Coastal Research* 32:  
786 519530. <https://doi.org/10.2112/JCOASTRES-D-15-00146.1>.
- 787 La Peyre, M. K., A. D. Nickens, A. K. Volety, G. S. Tolley, and J. F. La Peyre. 2003.  
788 Environmental significance of freshets in reducing *Perkinsus marinus* infection in eastern  
789 oysters *Crassostrea virginica*: potential management applications. *Marine Ecology*  
790 *Progress Series* 248: 165–176. <https://doi.org/10.3354/meps248165>.

- 791 Lango-Reynoso, F., J. Chavez-Villalba, J. C. Cochard, and M. Le Penneç. 2000. Oocyte size, a  
792 means to evaluate the gametogenic development of the Pacific oyster, *Crassostrea gigas*  
793 (Thunberg). *Aquaculture* 190: 183–199.
- 794 Lellis-Dibble, K. A. 2008. *Estuarine fish and shellfish species in U.S. commercial and*  
795 *recreational fisheries economic value as an incentive to protect and restore estuarine*  
796 *habitat*. NOAA Tech. Memo. NMFS-F/SPO ; U.S. Dept. of Commerce, National Oceanic  
797 and Atmospheric Administration, National Marine Fisheries Service.
- 798 Lenth, R. V. 2022. emmeans: Estimated Marginal Means, aka Least-Squared Means (version  
799 1.7.2).
- 800 Levinton, J., M. Doall, D. Ralston, A. Starke, and B. Allam. 2011. Climate Change, precipitation  
801 and impacts on an estuarine refuge from disease. *PLoS ONE* 6.  
802 <https://doi.org/10.1371/journal.pone.0018849>.
- 803 Li, A., H. Dai, X. Guo, Z. Zhang, K. Zhang, C. Wang, X. Wang, et al. 2021. Genome of the  
804 estuarine oyster provides insights into climate impact and adaptive plasticity.  
805 *Communications Biology* 4. Nature Publishing Group: 1–12.  
806 <https://doi.org/10.1038/s42003-021-02823-6>.
- 807 Li, A., L. Li, K. Song, W. Wang, and G. Zhang. 2017. Temperature, energy metabolism, and  
808 adaptive divergence in two oyster subspecies. *Ecology and Evolution* 7: 6151–6162.  
809 <https://doi.org/10.1002/ece3.3085>.
- 810 Li, L., A. Li, K. Song, J. Meng, X. Guo, S. Li, C. Li, et al. 2018. Divergence and plasticity shape  
811 adaptive potential of the Pacific oyster. *Nature Ecology & Evolution* 2. Nature Publishing  
812 Group: 1751–1760. <https://doi.org/10.1038/s41559-018-0668-2>.
- 813 Linhoss, A. C., R. Camacho, and S. Ashby. 2016. Oyster habitat suitability in the northern Gulf  
814 of Mexico. *Journal of Shellfish Research* 35: 841–849.  
815 <https://doi.org/10.2983/035.035.0412>.
- 816 Lipcius, R. N., D. B. Eggleston, S. J. Schreiber, R. D. Seitz, J. Shen, M. Sisson, W. T.  
817 Stockhausen, and H. V. Wang. 2008. Importance of metapopulation connectivity to  
818 restocking and restoration of marine species. *Reviews in Fisheries Science* 16: 101–110.
- 819 Loosanof, V. L., and H. C. Davis. 1952. Temperature requirements for maturation of gonads of  
820 northern oysters. *Biological Bulletin* 103: 80–96.
- 821 Luna, A., C. Caceres, C. Zúñiga-Pacheco, S. López-López, and B. Ceballos-Vázquez. 2000.  
822 Reproductive cycle of *Argopecten ventricosus* (Sowerby 1842) (Bivalvia: Pectinidae) in  
823 the Rada del Puerto de Pichilingue, B.C.S., Mexico and its relation to temperature,  
824 salinity, and food. *Journal of Shellfish Research* 19: 107–112.
- 825 Mackenzie, C. L. 2007. Causes underlying the historical decline in the eastern oyster  
826 (*Crassostrea virginica* Gmelin, 1791). *Journal of Shellfish Research* 26: 927–938.  
827 [https://doi.org/10.2983/0730-8000\(2007\)26\[927:CUTHDI\]2.0.CO;2](https://doi.org/10.2983/0730-8000(2007)26[927:CUTHDI]2.0.CO;2).
- 828 Mackin, J. 1962. Oyster disease caused by *Dermocystidium marinum* and other microorganisms  
829 in Louisiana. *Publication of the Institute of Marine Science, University of Texas*: 132–  
830 229.
- 831 Mann, R., M. Southworth, R. B. Carnegie, and R. K. Crockett. 2014. Temporal variation in  
832 fecundity and spawning in the eastern oyster, *Crassostrea virginica*, in the Piankatank  
833 River, Virginia. *Journal of Shellfish Research* 33: 167–176.  
834 <https://doi.org/10.2983/035.033.0116>.

- 835 Marshall, D. J., K. Monro, M. Bode, M. J. Keough, and S. Swearer. 2010. Phenotype–  
836 environment mismatches reduce connectivity in the sea. *Ecology Letters* 13: 128–140.  
837 <https://doi.org/10.1111/j.1461-0248.2009.01408.x>.
- 838 McCann, M. 2019. *Restoring Oysters to Urban Waters: Lessons Learned and Future*  
839 *Opportunities in NY/NJ Harbor*. New York, NY, USA: The Nature Conservancy.
- 840 McFarland, K., and M. P. Hare. 2018. Restoring oysters to urban estuaries: Redefining habitat  
841 quality for eastern oyster performance near New York City. *PLOS ONE* 13: e0207368.  
842 <https://doi.org/10.1371/journal.pone.0207368>.
- 843 McFarland, K., D. Rumbold, A. N. Loh, L. Haynes, S. G. Tolley, P. Gorman, B. Welch, et al.  
844 2022. Effects of freshwater release on oyster reef density, reproduction, and disease in a  
845 highly modified estuary. *Environmental Monitoring and Assessment* 194: 96.  
846 <https://doi.org/10.1007/s10661-021-09489-x>.
- 847 Medley, T. L. 2010. Wild Oysters, *Crassostrea virginica*, in the Hudson River Estuary: Growth,  
848 Health and Population Structure. New York City, New York: The City University of New  
849 York.
- 850 Morales-Alamo, R., and R. Mann. 1989. Anatomical features in histological sections of  
851 *Crassostrea virginica*, as an aid in measurements of gonad area for reproductive  
852 assessment. *Journal of Shellfish Research* 8: 71–82.
- 853 Morgan, S. G. 1995. Life And Death in the Plankton: Larval Mortality and Adaptation. In  
854 *Ecology of Marine Invertebrate Larvae*. CRC Press.
- 855 Morvezen, R., P. Boudry, J. Laroche, and G. Charrier. 2016. Stock enhancement or sea  
856 ranching? Insights from monitoring the genetic diversity, relatedness and effective  
857 population size in a seeded great scallop population *Pecten maximus*. *Heredity* 117: 142–  
858 148. <https://doi.org/10.1038/hdy.2016.42>.
- 859 Powell, E., J. Klinck, and E. Hofmann. 1996. Modeling diseased oyster populations. II.  
860 Triggering mechanisms for *Perkinsus marinus* Epizootics. *Journal of Shellfish Research*  
861 15.
- 862 R Core Team. 2018. R: A language and environment for statistical computing. Vienna, Austria:  
863 R Foundation for Statistical Computing.
- 864 Ray, S. M. 1952. A culture technique for the diagnosis of infection with *Dermocystidium*  
865 *marinum* in oysters. *National Shellfisheries Association Convention Addresses*: 9–13.
- 866 Ray, S. M. 1954. Biological studies of *Dermocystidium marinum* a fungus parasite of oysters.  
867 *The Rive Institute Pamphlet, Special Issue*.
- 868 Rose, J. M., J. S. Gosnell, S. Bricker, M. J. Brush, A. Colden, L. Harris, E. C. Karplus, et al.  
869 2021. Opportunities and challenges for including oyster-mediated denitrification in  
870 nitrogen management plans. *Estuaries and Coasts*. [https://doi.org/10.1007/s12237-021-](https://doi.org/10.1007/s12237-021-00936-z)  
871 [00936-z](https://doi.org/10.1007/s12237-021-00936-z).
- 872 Rybovich, M., M. K. La Peyre, S. G. Hall, and J. F. La Peyre. 2016. Increased temperatures  
873 combined with lowered salinities differentially impact oyster size class growth and  
874 mortality. *Journal of Shellfish Research* 35: 101–113.  
875 <https://doi.org/10.2983/035.035.0112>.
- 876 Sanford, E., and M. W. Kelly. 2011. Local adaptation in marine invertebrates. *Annual Review of*  
877 *Marine Science* 3: 509–535. <https://doi.org/10.1146/annurev-marine-120709-142756>.
- 878 Schindler, D. E., R. Hilborn, B. Chasco, C. P. Boatright, T. P. Quinn, L. A. Rogers, and M. S.  
879 Webster. 2010. Population diversity and the portfolio effect in an exploited species.  
880 *Nature* 465: 609–612. <https://doi.org/10.1038/nature09060>.



- 881 Shafee, M. S., and M. Daoudi. 1991. Gametogenesis and spawning in the carpet-shell clam,  
882 *Ruditapes decussatus* (L.) (Mollusca: Bivalvia), from the Atlantic coast of Morocco.  
883 *Aquaculture Research* 22: 203–216. <https://doi.org/10.1111/j.1365-2109.1991.tb00510.x>.
- 884 Shannon, C. E., and W. Weaver. 1949. *The Mathematical Theory of Communication*. University  
885 of Illinois Press, Urbana.
- 886 Shumway, S. E. 1996. Natural environmental factors. In *The Eastern Oyster: Crassostrea*  
887 *Virginica*, ed. V. S. Kennedy, R. I. E. Newell, and A. F. Eble, 2nd ed., 467–513. College  
888 Park, MD: University of Maryland Sea Grant Publications.
- 889 Starke, A., J. Levinton, and M. Doall. 2011. Restoration of *Crassostrea virginica* (Gmelin) to the  
890 Hudson River, USA: A spatiotemporal modeling approach. *Journal of Shellfish Research*  
891 39: 671–684. <https://doi.org/10.2983/035.030.0309>.
- 892 Starr, M., J. H. Himmelman, and J. C. Therriault. 1990. Direct coupling of marine invertebrate  
893 spawning with phytoplankton blooms. *Science*. American Association for the  
894 Advancement of Science. World. <https://doi.org/10.1126/science.247.4946.1071>.
- 895 Stinnette, I., M. Taylor, L. Kerr, R. Pirani, S. Lipuma, and J. Lodge. 2018. The State of the  
896 Estuary 2018. *NY/NJ Harbor & Estuary Program, Hudson River Foundation*.
- 897 Swannack, T. M., M. Reif, and T. M. Soniat. 2014. A robust, spatially explicit model for  
898 identifying oyster restoration sites: Case studies on the Atlantic and Gulf Coasts. *Journal*  
899 *of Shellfish Research* 33: 395–408. <https://doi.org/10.2983/035.033.0208>.
- 900 Telesh, I. V., and V. V. Khlebovich. 2010. Principal processes within the estuarine salinity  
901 gradient: A review. *Marine Pollution Bulletin* 61. Estuarine Ecosystems: Structure,  
902 Function and Management (ECSA-42 Symposium in Russia): 149–155.  
903 <https://doi.org/10.1016/j.marpolbul.2010.02.008>.
- 904 Thompson, R. J., R. I. E. Newell, V. S. Kennedy, and R. Mann. 1996. Reproductive processes  
905 and early development. In *The eastern oyster, Crassostrea virginica*, 335–370. College  
906 Park, MD: The University of Maryland Sea Grant Press.
- 907 Tuomisto, H. 2012. An updated consumer's guide to evenness and related indices. *Oikos* 121:  
908 1203–1218.
- 909 Volety, A. K., K. McFarland, E. Darrow, D. Rumbold, S. G. Tolley, and A. N. Loh. 2017. *Oyster*  
910 *Monitoring Network for the Caloosahatchee Estuary 2000-2015*. Fort Myers, FL: Florida  
911 Gulf Coast University.
- 912 Warner, J. C., W. R. Geyer, and J. A. Lerczak. 2005. Numerical modeling of an estuary: A  
913 comprehensive skill assessment. *Journal of Geophysical Research: Oceans* 110.  
914 <https://doi.org/10.1029/2004JC002691>.
- 915 Wilson, C., L. Scotto, J. Scarpa, A. Volety, S. Laramore, and D. Haunert. 2005. Survey of water  
916 quality, oyster reproduction and oyster health status in thr St. Lucie Estuary. *Journal of*  
917 *Shellfish Research* 24. National Shellfisheries Association: 157–165.  
918 [https://doi.org/10.2983/0730-8000\(2005\)24\[157:SOWQOR\]2.0.CO;2](https://doi.org/10.2983/0730-8000(2005)24[157:SOWQOR]2.0.CO;2).
- 919

920

921 **ELECTRONIC SUPPLEMENTARY INFORMATION**

922 **Table S1.** Lengths of oysters sampled for histology by sex (female, male, average length (mm) ±  
 923 S.E). Locations are listed in order by latitude, from north to south. Locality abbreviations  
 924 explained in Fig. 1 legend and in the text

| Location   | Line        | June 2018                  | July 2018                 | August 2018               | July/August 2019          | September 2019            |
|------------|-------------|----------------------------|---------------------------|---------------------------|---------------------------|---------------------------|
| <b>IRV</b> | Native      | -                          | -                         | -                         | 69.0 ± 4.5:<br>66.4 ± 4.9 | 71.2 ± 4.4,<br>64.6 ± 4.8 |
| <b>HH</b>  | Aquaculture | 36.7 ± 1.8,<br>32.9 ± 2.2  | 45.2 ± 3.8,<br>41.0 ± 2.3 | 51.4 ± 4.2,<br>49.0 ± 2.5 | -                         | -                         |
|            | Hatchery    | 53.3 ± 3.8,<br>46.5 ± 1.8  | 35.6 ± 2.7,<br>34.6 ± 2.4 | N/A                       | -                         | -                         |
|            | Native      | 34.7 ± 4.5,<br>36.6 ± 1.3  | 42.8 ± 3.8,<br>38.7 ± 3.1 | N/A                       | 63.9 ± 3.4,<br>62.6 ± 5.1 | 71.2 ± 4.4,<br>64.6 ± 4.8 |
| <b>SB</b>  | Aquaculture | 63.0 ± 7.4,<br>55.9 ± 4.8  | 45.8 ± 3.0,<br>45.5 ± 1.6 | 53.7 ± 5.6,<br>51.6 ± 4.1 | -                         | -                         |
|            | Hatchery    | 52.7 ± 3.4,<br>49.1 ± 2.7  | 56.0 ± 6.4,<br>59.0 ± 5.6 | 74.0 ± 3.6,<br>61.5 ± 2.1 | -                         | -                         |
|            | Native      | 42.0 ± 0.0,<br>38.2 ± 2.3  | 49.7 ± 3.2,<br>42.0 ± 2.1 | 47.1 ± 3.1,<br>52.0 ± 2.4 | -                         | -                         |
| <b>RED</b> | Aquaculture | 70.5 ± 17.5:<br>60.5 ± 6.2 | 64.0 ± 0,<br>45.6 ± 4.2   | 72.0 ± 8.0,<br>57.8 ± 3.6 | -                         | -                         |
|            | Hatchery    | -                          | -                         | -                         | -                         | -                         |
|            | Native      | -                          | -                         | 45.0 ± 0,<br>48.2 ± 2.6   | -                         | -                         |
| <b>PGB</b> | Aquaculture | 94.5 ± 1.5,<br>68.5 ± 4.3  | 55.2 ± 3.0,<br>59.4 ± 2.9 | 0,<br>52.7 ± 2.7          | 0,<br>95.0 ± 2.4          | 0,<br>91.3 ± 2.7          |
|            | Hatchery    | -                          | 65.3 ± 3.1,<br>57.8 ± 3.0 | 48.2 ± 5.0,<br>58.3 ± 3.2 | -                         | -                         |
|            | Native      | 49.2 ± 3.0,<br>44.6 ± 1.7  | 45.5 ± 3.5,<br>43.7 ± 1.7 | 45.8 ± 3.1,<br>52.8 ± 3.0 | 67.1 ± 4.7,<br>68.6 ± 3.2 | 81.5 ± 8.2,<br>68.3 ± 2.6 |
| <b>KCC</b> | Aquaculture | -                          | -                         | -                         | 91.5 ± 8.0,<br>85.7 ± 3.4 | 91.0 ± 5.8,<br>82.5 ± 3.7 |
|            | Native      | -                          | -                         | -                         | 73.1 ± 5.6,<br>70.6 ± 4.6 | 86.5 ± 4.4,<br>76.9 ± 2.7 |

925

926

927

928

929
